## A Qualitative Study of User Experiences in Harm Reduction Programs

Olasehinde Ben Adebayo<sup>1</sup>, Teresa Innis<sup>2</sup>

Olasehinde B. Adebayo PhD(c), MPH(c), MEd (HPE)<sup>1</sup>, Teresa Innis MAEd, BA Psych<sup>2</sup>

<sup>1</sup>School of Public Health, University of Saskatchewan, Canada

<sup>2</sup>Executive Director, Nēwo-Yōtina Friendship Centre

**Corresponding Author:** Olasehinde Ben Adebayo; [oba624@usask.ca](mailto:oba624@usask.ca)

### Abstract

The ongoing Canadian opioid crisis has resulted in alarming rates of overdoses and related harms. Harm reduction programs have emerged as a crucial public health strategy to mitigate these risks. The Nēwo-Yōtina Friendship Centre (NYFC) offers harm reduction programs that provide a safe injection site and clean supplies to reduce substance use-associated harm. Researchers have not extensively studied the effectiveness and user experience of this program. Studies have demonstrated the effectiveness of harm reduction programs in mitigating adverse effects of drug use, such as disease transmission and overdose. This in-depth study looked at what program users went through in the NYFC harm reduction program. This was done by looking at the program environment, unexpected outcomes, reasons for seeking services, and obstacles to access. The study used a phenomenological approach, utilising semi-structured interviews with 13 participants and analysing interview data using thematic analysis<sup>2</sup> through NVivo. The motivations for seeking services were safety, access to clean supplies, and a non-judgmental environment. Findings revealed that users valued a safe and welcoming atmosphere fostered by friendly, supportive, and non-judgmental staff. The program's positive outcomes included reduced harm, access to resources, and emotional support. Nevertheless, limited operating hours, stigma, small space,

**NOTE:** This preprint reports new research that has not been certified by peer review and should not be used to guide clinical practice.

and a lack of awareness were identified as barriers to access. The study recommends improving accessibility, enhancing support systems, and addressing unanticipated outcomes like drug use enablement to optimise the program's effectiveness. This study provides valuable insights into user experience within the NYFC program. The findings inform program improvements, enhance service delivery, and contribute to a broader understanding of harm reduction strategies for addressing the opioid crisis. It emphasises the importance of user-centred approaches in developing and implementing effective harm reduction programs.

**Keywords;** Harm reduction, User experience, Needle exchange program, Substance use, Supervised injection facility, Program evaluation, Opioid crisis, Thematic analysis

## Chapter I: Introduction

The opioid crisis has left a devastating mark across Canada, yet its impact has been uneven. While Western provinces and territories saw the highest death rates in 2016, Saskatchewan and other Prairie and Eastern provinces showed a more balanced mortality rate between genders, approaching a 1:1 ratio. This contrasts with the 4:1 male-to-female ratio observed in the West (Belzak & Halverson, 2018). Such regional variations highlight the complex interplay of factors contributing to the opioid crisis's manifestation across the country. The COVID-19 pandemic further exacerbated the situation, causing an unexpected surge in overdose deaths throughout Canada. Saskatchewan, in particular, experienced a significant increase, demonstrating the pandemic's disruptive impact on harm reduction efforts and healthcare access (Snowdon & Choi, 2024). Saskatchewan, similar to many regions, faces the interconnected challenges of homelessness, addiction, and mental health issues. These complex problems are manifested in rising overdose rates. The opioid crisis has had a particularly devastating effect on communities across Canada, with an alarming number

of opioid-related deaths recorded between 2016 and 2022. This critical situation emphasizes the urgent need for effective public health interventions.

In response to the escalating substance use crisis, harm reduction has become a vital strategy to mitigate the negative consequences associated with drug use. Harm reduction is a practical approach that prioritizes minimizing harm and promoting health, even without complete abstinence. This approach includes interventions like needle exchange programs (NEP), needle and syringe programs (NSP), supervised injection facilities (SIS), naloxone distribution and education programs, and stable housing, among others. This qualitative study aims to explore user experiences within these harm-reduction programs. By examining the perspectives of individuals who utilize these services, we aim to gain a deeper understanding of their impact and effectiveness. Through a comprehensive analysis of user narratives, this research will illuminate the strengths, weaknesses, and potential areas for improvement in the delivery of harm reduction services. This study seeks to contribute to the ongoing dialogue surrounding harm reduction and inform future research and policy development in this critical area of public health

### **Purpose of the Project**

This study aims to explore the lived experiences of participants in a harm reduction program in Regina, Saskatchewan. The primary goal is to generate rich data that will inform both internal evaluation (which will assess the effectiveness of the NYFC harm reduction) and quality improvement efforts within the organization (which will identify areas for improvement).

The objectives of the project are to;

- Examine the program environment: Assess the physical space, atmosphere, and staff interactions with users within the NYFC harm reduction production program.

- Uncover unanticipated outcomes: Discover unexpected outcomes and identify both positive and negative consequences of program participation.
- Understand the motivations that led participants to seek out the NYFC harm reduction services: Investigate the reasons why users sought harm reduction services.
- Identify access barriers: Uncover obstacles that prevent individuals from accessing or fully utilizing NYFC harm reduction services.

### **Background of the Problem**

Harm reduction programs aim to reduce the negative consequences of substance use without necessarily promoting abstinence (Leslie et al., 2008). They often provide sterile injection equipment, a safe injection site, naloxone training, drug testing, counselling, and referrals to addiction treatment services. Research demonstrates the effectiveness of harm reduction programs in reducing transmission of infectious diseases, preventing overdoses, and promoting access to healthcare (National Institute on Drug Abuse, 2021; Pauly, 2008).

### **Project Significance**

Harm reduction programs offer a crucial approach to mitigating the risks associated with substance use. Understanding the user experience at NYFC is critical for improving service delivery, particularly at NYFC. This qualitative study at NYFC, Regina, Saskatchewan, will contribute valuable insights into user perspectives on NYFC program effectiveness, accessibility, and potential areas for improvements.

### **Statement of the Problem**

Substance use continues to be a significant public health concern in Canada, with people experiencing high rates of opioid overdoses (Belzak & Halverson, 2018). Harm reduction programs offer a critical strategy for mitigating these risks (Public Health Agency of Canada, 2023; Public Health Agency of Canada, 2024). However, limited research exists

on user experiences within these programs in Regina, making it difficult to assess their effectiveness and identify areas for improvement.

### Research Questions

1. How do participants experience the program environment (physical space, atmosphere, staff interactions) at NYFC?
2. What are the unanticipated positive and negative outcomes of NYFC program participation for users?
3. What factors motivate individuals to seek out harm reduction services at NYFC?
4. What barriers prevent people from accessing or fully utilizing the harm reduction program services at NYFC?

The Nēwo-Yōtina Friendship Centre (NYFC) is a member of the Aboriginal Friendship Centres of Saskatchewan and the National Association of Friendship Centres. NYFC is a primary provider of culturally enhanced programs and services to urban Indigenous residents. It is an important resource for people living in Regina, Saskatchewan, Canada. The NYFC offers a variety of programs and services to help people adjust to life. These include The organization offers a range of supportive programs:

- Supportive Housing: Supportive housing assists individuals and families in maintaining stable housing through weekly home visits and provides support in achieving goals.
- Mental Health (Resolution Health Support Program): Provides emotional, spiritual, physical, and mental support to Indian residential school survivors, their families, and communities through various programs, including elder support, support groups, advocacy, and cultural activities.
- Youth Outreach: Offers social and recreational activities for urban youth aged 12-18, fostering personal growth and leadership skills.

- Harm Reduction: This approach provides education, information, and supplies to reduce the harm associated with substance use.

## **Chapter II: Literature Review**

Harm reduction programs are a controversial topic, but they are effective in reducing the negative consequences associated with substance use without necessarily requiring abstinence. Harm reduction operates on a foundation of pragmatic principles grounded in public health ethics to promote the well-being of the population (Inciardi & Harrison, 1999). The harm reduction philosophy stresses and prioritizes the user's health, autonomy, and well-being, meeting them at their current level of development or understanding in their journey. Support for harm reduction does not require complete cessation of substance use. Instead, it empowers the user to make informed choices and reduce the associated risks.

### **Core Principle of Harm Reduction**

Public health ethics and a pragmatic approach to reducing human behaviour risks form the foundation of harm reduction (Inciardi & Harrison, 1999). his approach prioritizes interventions that directly target the negative consequences of risky behaviours while emphasizing the importance of involving the target population in the design, implementation, and evaluation of these interventions. Harm reduction respects the human rights and dignity of people who do risky things and looks at public health from the point of view that evidence-based interventions are the best way to improve people's health and well-being (Inciardi & Harrison, 1999). It maintains a non-judgmental stance, focusing solely on harm reduction irrespective of an individual's decision to continue engaging in risky behaviour (Inciardi & Harrison, 1999). Moreover, it values practicality and pragmatism, emphasizing feasible interventions readily implementable in real-world settings (Inciardi & Harrison, 1999). However, Inciardi & Harrison (1999) recognize harm reduction as an innovative and

adaptable approach that continuously evolves to meet the changing needs of populations and address emerging risks.

### **Existing Research on Harm Reduction Programs**

Existing research on harm reduction programs and their impact on users provides valuable context for a qualitative study aiming to understand user experiences. Studies have shown that harm reduction programs, which prioritize reducing the negative consequences of drug use rather than focusing solely on abstinence, can be effective in mitigating risks associated with drug use. Researchers have identified several harm reduction services for substance users, including needle and syringe access programs (NEPs, NSPs), supervised injection facilities (SIFs), drug checking and testing, and peer support programs; however, housing has not received formal approval as a harm reduction program.

#### **Needle Exchange Programs / Needle and Syringe Program**

Research demonstrated the efficacy of needle exchange programs (NEP) in reducing HIV transmission among people who inject drugs (Fernandes et al., 2017; Tee-Melegrito, 2021; Yeh et al., 2023). NEPs are community-based programs that provide sterile and clean needles and syringes to people who inject drugs (PWID) in exchange for used ones and safely dispose of used products (Fernandes et al., 2017; Tee-Melegrito, 2021; Yeh et al., 2023). The program also serves as a pathway to reach out to people currently using drugs and provide them with access to relevant services and programs, including HIV screening (Tee-Melegrito, 2021). The primary goal of NEPs in harm reduction is to curb and prevent the spread of bloodborne infections, such as hepatitis C (Hep. C) and Human Immunodeficiency Virus (HIV), by preventing the reuse and sharing of contaminated needles. This results in PWID's health and well-being improving.

Fernandes et al. (2017) conducted systematic reviews that evaluated the effectiveness of needle and syringe programs (NSPs) in reducing the transmission of blood-borne infections (HIV, HCV, and HBV) and injecting risk behaviours (IRBs) among people who inject drugs (PWIDs). The systematic search included 13 systematic reviews with varying methodological quality. The outcome shows that NSPs are effective in reducing HIV transmission and IRBs, while the evidence for HCV reduction is mixed (Fernandes et al. (2017). The review further shows that NEPs do not increase drug use or crime rates (Fernandes et al., 2017). NEPs can help reduce public disorder by providing a safe and hygienic way for PWID to dispose of used needles (Fernandes et al., 2017).

Yeh et al. (2023) carried out another systematic review, a meta-analysis on the effects of needle and syringe exchange programs (NSPs) on HIV-related risk behaviours in low- and middle-income countries (LMICs). The study specifically examined the impact of NSPs on both individual- and community-level needle-sharing behaviours and other HIV-related outcomes (Yeh et al., 2023). In their analysis, the authors searched five databases for relevant studies published through July 2021 and included 42 interventions from 35 studies with a total of 56,751 participants. The meta-analysis showed that NSP exposure was significantly associated with reduced needle-sharing behaviours at both the individual level odds ratio (OR) = 0.25 and the community level OR = 0.39 (Yeh et al., 2023). The study also found that NSP exposure was associated with reduced HIV incidence and increased HIV testing, but there were no consistent associations with the prevalence of bloodborne infections (Yeh et al., 2023). The authors concluded that the current evidence suggests that NSPs in LMICs have positive impacts in reducing HIV-related risk behaviours.

Research has consistently shown that NEPs are effective in reducing the transmission of HIV among PWID. Studies have shown that NPEs are associated with a reduced reduction in HIV incidence (Tee-Melegrito, 2021; Yeh et al., 2023). Additionally, NEPs and NSPs



provide a point of contact for PWID to access other health and social services, such as HIV testing, counselling, and drug treatment (Tee-Melegrito, 2021; Yeh et al., 2023). Despite the evidence supporting their effectiveness, NEPs remain controversial in some communities due to concerns about enabling drug use and attracting crime. The study finds that NSPs are likely effective at lowering the harms related to injecting drugs, especially when they are part of a larger harm-reduction strategy. It also stresses how important it is to have high coverage and multi-component programs to get the most out of NSPs (Fernandes et al., 2017).

### **Safe Injection Site**

Supervised consumption sites provide a safe, clean space for people to use their drugs in the presence of trained staff (Government of Canada, 2024). These sites offer a range of services, including drug testing, access to healthcare and treatment, and referrals to social services. Ng et al. (2017) explore shreds of evidence supporting the implementation of SISs to address the challenges associated with intravenous drug use. These sites have many benefits, including reducing the risk of accidental overdose, connecting people to social services, reducing calls for ambulances, and reducing the spread of infectious diseases like HIV infections (Government of Canada, 2024; Levengood et al., 2021; Ng et al., 2017). There are 88 fewer overdose deaths per 100,000 person-years in areas near SISs, 67% fewer calls for ambulances for overdose treatment, and an estimated 6 to 57 fewer HIV infections each year because of SISs. This suggests that SISs can also save money on healthcare costs (Ng et al., 2017).

Kerr et al. (2017) offer a comprehensive overview of the history, current status, and future directions of supervised injection facilities (SIFs) in Canada. SIFs stemmed from the 1990s Vancouver's overdose crisis (Kerr et al., 2017). The work of Kerr et al. (2017) highlights the critical role of community activism and advocacy in establishing Insite, SIF. SIF provides evidence-based benefits for reducing public disorder, disease transmission, and

overdose mortality (Kerr et al., 2017). There is a need for legislative changes, innovation in SIF programming, and expansion of these services to address the ongoing overdose crisis in Canada. The systematic review by Levenson et al. (2021) investigates the effectiveness of supervised injection facilities (SIFs) as a harm reduction strategy for people who inject drugs (PWID). The review focused on quantitative studies comparing SIFs to control conditions, assessing their impact on overdose mortality and morbidity, injection behaviours, access to addiction treatment, and crime/public nuisance. The majority of the 22 included studies were conducted in Vancouver, Canada. SIFs lower the risk of opioid-related overdose deaths and injuries compared to other areas. They also lower the rate of sharing needles and getting skin infections from injections. Users were more likely to get treatment and detoxification services, and the crime rate went down (Levenson et al., 2021). The findings support the implementation of SIFs as part of a comprehensive approach to addressing the overdose crisis (Levenson et al., 2021).

Unfortunately, factors like site capacity may limit the effectiveness of SISs, despite their potential to mitigate some of the harms associated with drug use (Ng et al., 2017). So, people need to push for the creation of SISs that are specific to each community's needs. They should be shown to play a part in lowering the harm caused by drugs and making it easier for people to get medical care and addiction treatment (Ng et al., 2017).

### **Naloxone Distribution and Training Programs**

Naloxone is a safe and easy-to-use medication that can reverse opioid overdoses (Razaghizad et al., 2021; US Centre for Disease Control and Prevention, 2024; Wenger et al., 2022). It comes in two forms: nasal spray and injectable. Naloxone works by blocking the effects of opioids and restoring normal breathing. Cherrier et al. (2021) conducted a systematic review of economic evaluations of community naloxone distribution and found nine studies that looked at how cost-effective it was to distribute naloxone to different groups

of people in different settings. The review concludes that community distribution of naloxone is a cost-effective harm-reduction intervention for substance users (Cherrier et al., 2021). Several reviews posited that the effectiveness of naloxone distribution as a harm reduction strategy depends on the rate of opioid overdose, by standards of willingness to intervene, naloxone availability, and the reach of the intervention impacts the cost-effectiveness (Cherrier et al., 2021; Enich et al., 2023; Naumann et al., 2019).

People learn how to safely administer and handle naloxone medication during an overdose through naloxone training (Enich et al., 2023; Naumann et al., 2019). It is a community- and individual-empowering initiative to prevent overdose. Overdose Education and Naloxone Distribution (OEND) programs work to teach people more about opioid overdose, change how people feel about naloxone, and give people the skills they need to handle overdoses (Enich et al., 2023; Naumann et al., 2019; Razaghizad et al., 2021). OEND has been linked to a decrease in opioid-related deaths. High-concentration intranasal naloxone is as effective as intramuscular naloxone, while lower-concentration intranasal naloxone is less effective (Razaghizad et al., 2021).

However, Enich et al. (2023) investigate how people who use drugs and naloxone distributors envision effective overdose education and naloxone distribution programs. The research found that while participants were generally knowledgeable about naloxone, they primarily obtained it through their peers (Enich et al., 2023). The study stresses how important it is for OEND programs to be fun, led by peers, and focus on the mental aspects of overdose while tackling stigma, including talks about drug use and recovery, and offering a wider range of services (Enich et al., 2023).

### **Drug Checking and Testing**

Drug checking services (DCS) allow people to test their drugs for purity and adulterants, helping them make more informed decisions about their drug use (Leece, 2017).

Fourier-transform infrared spectroscopy (FTIR) and fentanyl test strips are two DC technologies that help people find fentanyl and other substances in drugs (Harris, 2022). Researchers have investigated the impact of drug testing services on mitigating overdose crises, particularly in the context of the rise of fentanyl in the unregulated drug market (Harris, 2022; Leece, 2017; Moran et al., 2024). Moran et al. (2024) use qualitative data from interviews with both service providers (clinicians, researchers, harm reduction workers) and clients (individuals who use drugs) to understand the perceived impact and utility of DCS. The value of drug checking extends beyond overdose prevention, encompassing broader benefits for individual agency, community health, and public health surveillance (Moran et al., 2024).

Harris argues that the overdose crisis is a consequence of prohibitionist drug policies, leading to a volatile and unpredictable drug supply (Harris, 2022). The rise of fentanyl, a potent synthetic opioid, has exacerbated this crisis, as it is often mixed with other drugs or sold in counterfeit pills, increasing the risk of overdose for unsuspecting users (Harris, 2022). But DCS, which has many benefits, has become an important part of harm reduction strategies because it gives people the information they need to make smart choices about their drug use, which leads to changes in behaviour that lower the risk of overdose (Harris, 2022; Leece, 2017; Moran et al., 2024). These services may also provide education on safer drug use practices and harm reduction strategies. Unfortunately, research underscores the complexities and challenges associated with drug-checking implementation, including legal barriers, social stigma, and the need for comprehensive harm reduction approaches that address the root causes of drug-related harms.

### **Debates and Challenges Surrounding Harm Reduction**

Despite the well-documented efficacy of harm reduction strategies, their implementation remains contentious. A primary objection lies in the perceived moral hazard, with critics

arguing that such programs condone or even promote substance abuse. However, proponents counter that harm reduction prioritizes public health and safety, offering a pragmatic rather than moralistic approach. Another concern revolves around the potential for increased crime and public disorder. Despite these assumptions, empirical evidence fails to substantiate claims that harm reduction initiatives escalate criminal activity rates in surrounding areas (Kerr et al., 2017). Lastly, the 'gateway effect' hypothesis, suggesting harm reduction programs like NEP and NSP lead to harder drug use, similarly lacks empirical evidence.

Harm reduction programs have also been found to foster a sense of community and support among participants, which can be crucial in promoting recovery and reducing feelings of isolation. The impact of harm reduction programs extends beyond individual users, as research suggests that these programs can also contribute to broader community health and safety. While existing research provides a solid foundation for understanding the impact of harm reduction programs, a qualitative study focusing on user experiences can offer deeper insights into the lived realities of individuals participating in these programs. By exploring the subjective experiences of program participants, researchers can gain a richer understanding of the factors that influence engagement, satisfaction, and overall program effectiveness.

### **Phenomenology**

The phenomenological approach is particularly well-suited for this study because it focuses on understanding the lived experiences of individuals (Creswell & Poth, 2024). By their nature, harm reduction programs address complex and deeply personal issues. A phenomenological approach allows researchers to delve into the subjective realities of program users, exploring their perceptions, emotions, and meanings associated with their experiences (Creswell & Poth, 2024). This in-depth understanding can reveal insights that more quantitative or objective methods might miss.

In this study, phenomenology enables researchers to explore the multifaceted nature of user experiences within harm reduction programs. By conducting in-depth interviews, researchers gain a rich understanding of how users perceive the program environment, their motivations for seeking services, and the barriers they encounter while accessing harm reduction programs. Phenomenology's emphasis on detailed descriptions and nuanced interpretations allows researchers to uncover unanticipated outcomes and identify potential areas for intervention, directly informed by the lived experiences of program users.

### **Chapter III: Methodology**

The literature search was conducted using the following electronic databases: PubMed, PsycINFO, CINAHL, and Web of Science. The search terms included: "harm reduction," "user experience," "qualitative research," "needle and syringe program," "substance use," "supervised injection facility," and "program evaluation". We limited the search to English-language articles published between 2014 and 2024. The articles identified for a literature review were screened, assessed for eligibility, and ultimately included in the review. Studies were included if they met the following criteria:

- Focused on harm reduction interventions
- Employed a rigorous research design
- Full-text articles

#### **Research Design**

This study adopts a qualitative methodology grounded in phenomenology, aiming to gain a profound understanding of the lived experiences and subjective perspectives of participants about harm reduction (Creswell & Poth, 2024). Data collection was primarily conducted through semi-structured interviews (Appendix B), emphasizing the centrality of participants' subjective lived experiences and perspectives (Appendix D). To minimize

researcher influence and capture authentic experiences, the research was conducted in a naturalistic setting, where harm reduction supplies are typically collected.

The interview guide for the semi-structured interviews covered various topics, including user demographics, engagement with the NYFC program, the program's services, the impact of NYFC harm reduction on users, and the program environment. Before administration, the guide was refined by the PI, and an informed consent protocol was followed (Appendix C). We inputted anonymized interview data into NVivo, cleaned it, and coded it. A quality check using a random sample of data points was conducted to ensure data accuracy. In-depth interviews serve as the primary data source, capturing participants' experiences, perceptions, and feelings related to the program. The goal is to comprehensively describe their lived experiences, gaining insights into their navigation of the program and the various factors (individual, interpersonal, community) influencing their experiences. In this study, the individual level of the social-ecological model was considered. At the individual level, one-on-one interviews explored the participants' motivations, experiences with substance use, and the impact of the centre's harm reduction programs on their journey.

### **Participant Recruitment Strategy**

The researcher partnered with the practicum site to advertise the study on the centre notice board using posters (Appendix A), one-on-one discussions with users and the NYFCs Social Media Page (Facebook). We conducted face-to-face interviews with the participants at the harm reduction centre using an interview guide (Appendix B), prioritizing informed consent, participant safety, and anonymity.

The informed consent document was read to the research participants. The participants acknowledged their understanding of the content of the informed consent and signed the informed consent document as their approval to participate in the interviews.

### **Data collection methods**

The data collection phase of the research, which took place at the NYFC facility in Regina between July 8th through July 30th, 2024, involved semi-structured one-on-one interviews with 13 participants. The interviews were audio-recorded to ensure accuracy for later transcription and analysis. The recruitment process utilized multiple channels, including the NYFC's official Facebook page, physical notice boards within the facility, and direct communication with clients during their visits. Potential participants' initial reluctance, stemming from concerns about proximity to the Regina Police and potential confidentiality breaches, was addressed through reassurances and the introduction of a \$5 honorarium. To further uphold ethical standards, we implemented a post-transcription member-checking process, in which a randomly selected group comprising over 20% of the participants confirmed the accuracy of their transcribed responses.

### **Data analysis**

The audio-taped interviews were transcribed using TurboTranscribe, an online application. NVivo was then utilized for data import, coding, theme development, visualization, memos, and annotation (Adu, 2023; Lumivero, 2024). The analysis of the interview transcripts involved a three-step process, employing thematic analysis, a qualitative data analysis approach that involves identifying, analyzing, and reporting patterns (themes) within the collected data (Braun & Clarke, 2006). This inductive approach enabled the identification of emergent themes across the interviews. The core objective of this qualitative study is to gain a deep understanding of how participants perceive and interact with the Harm Reduction Program's services at NYFC, ultimately aiming to identify areas for improvement. Qualitative data from the interviews were coded and analyzed thematically, allowing for the identification of recurring patterns and key themes within the user experiences.

While phenomenology served as the primary approach, inductive thematic analysis was employed as a tool to analyze the data within the phenomenological framework



(Kalpokas & Hecker, n.d.). The thematic analysis offered a systematic way to organize, analyze, and present the data collected through semi-structured interviews, aiding in the identification, categorization, and description of recurring patterns or themes within the dataset (Braun & Clarke, 2006; Maguire & Delahunt, 2017; Plessis, 2022). The inductive approach facilitated the identification of recurring themes across the interviews, synthesizing individual user experiences into a broader understanding of the program (Braun & Clarke, 2006).

The thematic analysis approach was carried out following established steps (Braun & Clarke, 2006; Maguire & Delahunt, 2017; Plessis, 2022): familiarization with the interview data by reading and re-reading transcripts and all qualitative information collected; codes were assigned to segments of data representing meaningful units related to the research questions. As a result, codes with common ideas were grouped together into broader categories, which emerged as themes. By identifying core themes, a clear and concise picture of the lived experiences being explored can be presented (Braun & Clarke, 2006; Maguire & Delahunt, 2017). The themes were then reviewed to ensure that they adequately captured the data they represented and were supported by relevant quotes. Finally, the themes were defined and named appropriately, followed by report writing. The combination of phenomenology and thematic analysis allows for a rich and comprehensive understanding of user experiences within harm reduction programs.

### **Trustworthiness of the Research**

Qualitative research approaches prioritize trustworthiness, ensuring that findings accurately represent the experiences and perspectives of participants. To foster confidence in the application of qualitative research, it is critical to establish credibility, transferability, dependability, and confirmability (Ahmed, 2024; Creswell & Miller, 2000; Lincoln & Guba, 1982). The reliability of this study depends on the extent to which its results accurately reflect

the reality of the phenomenon being investigated. Trustworthiness is essential for ensuring that research findings can be utilized to inform policy development and enhance harm reduction programs.

### **Credibility**

Morse (2015) suggests researchers critically examine their work, asking if individuals who have lived the experience would recognize themselves in the study's conclusions. A powerful strategy for establishing credibility was to expose the findings to the scrutiny of multiple viewpoints, a method called member checking (Guba, 1981). We provided the researcher participant with the opportunity to confirm the transcribed data as an accurate reflection of their submission. To further promote credibility, semi-structured interviews provide a flexible framework for exploring participants' experiences, ensuring their unique experiences are captured genuinely and thoroughly recommended (Brinkmann, 2014). Employing inductive thematic analysis, as described by Braun and Clarke (2006), allows themes to surface naturally from the data, minimizing researcher bias and bolstering the study's dependability.

The researchers also kept a reflective journal to document personal biases, assumptions, and experiences that might potentially influence data interpretation, adhering to principles of openness. The University of Saskatchewan Ethics Board ensured the safety and ethical conduct of the research through its exemption approval and rigorous review of the ethics application. Such rigour and validation guarantee that the research findings are firmly rooted in the empirical data and genuinely reflect the lived experiences of the study's participants.

### **Dependability**

To enhance the dependability of this qualitative inquiry, a multifaceted approach was employed. Triangulation was achieved by collecting data from diverse avenues: semi-

structured interviews and comprehensive field notes, a valuable asset for analysis and interpretation (Morse, 2015). This strategy guarantees a holistic comprehension of the phenomenon under scrutiny, mitigating the potential pitfalls of a singular viewpoint.

Additionally, the researcher maintained a reflexive journal, meticulously chronicling personal background, encounters, and potential prejudices. This practice ensures that the research endeavour meets rigorous standards and meaningfully contributes to harm reduction practices.

### **Confirmability**

To promote the confirmability of the study and ensure the results are firmly rooted in the data, a multi-pronged approach was adopted. Field notes and reflective journaling served as supplementary sources of information, corroborating the insights gathered from the semi-structured interviews. The researchers maintained an audit trail that documented the research process, decisions made, and analytical procedures followed. This comprehensive record enables independent scrutiny and validation of the research outcomes, promoting transparency and methodological rigour (Morse et al., 2002). Additionally, we conducted member checking by sharing transcribed audio with select research participants, soliciting their feedback, and confirming that the interpretations accurately captured their lived experiences (Creswell & Miller, 2000). This step reinforces the credibility and validity of the findings, ensuring they resonate with the realities of the harm reduction program users.

### **Transferability**

The study's applicability to other settings, or its external validity, was enhanced through the use of in-depth interviews that generated rich, detailed accounts (Guba, 1981; Morse, 2015) of the participants' lived experiences. Also, using a sample that is diverse in terms of gender, race, and culture (Aboriginal, Canadian, Filipino-Canadian, etc.) makes it more likely that the results will be useful in similar situations. Comprehensive descriptions of

the research setting, participants, and results further empower readers to assess the study's pertinence to different environments. While acknowledging the unique aspects of NYFC, the study identified common themes and patterns that could inform broader harm reduction initiatives

## **Chapter IV: Results**

### **Research Question 1**

How do participants experience the program environment (physical space, atmosphere, staff interactions) at NYFC?

#### **Theme 1: Positive Staff Interactions**

Codes: Friendly staff, Supportive staff, Helpful staff, Good rapport

These statements' overarching theme is the overwhelmingly positive interactions with staff members. Participants consistently describe the staff as friendly, supportive, and helpful, the staff's willingness to listen, help, and create and foster a welcoming atmosphere and environment. This positive rapport contributes significantly to their overall sense of well-being and comfort.

*"The staff, they're great with me. They, they're always smiling, happy, and they're always truthful, and I, like, it feels, feels like home, like how I was growing up on my research."*

*"The staff, they're friendly. They're nice. I never had any negative... I don't think I've really like, um, had much interaction with them to have a negative interaction. So far everything's been pretty good and everyone's friendly."*

*"They are very, very helpful for what they do and they always try their 110% that they put into their people."*

*"Well, the thing is, the people here, they treat me nicely. When I come here, I have coffee and water, and, you know, it makes me feel good. Like people help you, you know, that's one thing*

*I've noticed about this place. People help you when you when you need help, you know."*

*"My interaction with staff is, like, top-notch, like, five stars. Like, they're great people here.*

*And they're just, like, I think it, I believe, like, they all do it, because, like, they do want to*

*help, and they genuinely like their jobs, and, yeah, yeah." .... "good rapport"*

*... "friendly" ... "good conversations."*

## **Theme 2: Safe and Welcome Atmosphere**

Code: Comfortable environment, Welcoming atmosphere

The overall atmosphere of the centre was described as safe, welcoming, and friendly, providing a sense of belonging and community. Participants found the centre to be a comfortable and relaxing space where they could rest, socialize, and access resources. This indicates that the overall atmosphere is positive and inviting

*"Yeah, it's comfortable. It's, the resources, the built-in board where they have, like, uh, the programs and whatnot, they're pretty good. It's pretty good."*

*"Yeah, it feels comfortable. It feels like I can come into a centre and like know someone and right there already means I will feel comfortable because if I go into somewhere where I don't know anybody, I'm not going to feel comfortable. So I don't know. I usually know people that go here."*

*"Well, right now it's hot. It's hot outside there. Yeah, but otherwise it's nice, you know.*

*Otherwise, it's real nice, yeah."*

*"Well, because, well, the thing is, ever since I started coming here, well, I come here to have some, have coffee, and a place to relax, you know.... "Yeah, real nice people. I come and rest*

*here, yeah. That place is, you know because I'm getting too old to walk around or run*

*around, you know..." a safe place for drug use"*

### **Theme 3: Physical Space: Small and Crowded**

Code: Limited space, Cramped

Some participants mentioned that the physical space was small and could get crowded, particularly during mealtime. This suggests that the physical space might be inadequate at times

*"This space, this downtown one, it's quite small compared to the other ones. The other ones, you guys have your other housing and whatever else you do here. And like I could use the resources just as much as the next guy, but that's not here. I don't need your guys' resources to be successful. I know how to be successful on my own. I get food every day for free." ...*

*"The centre feels a little small.*

### **Theme 4: Discomfort with Other Clients:**

Code: disrespectful clients, challenging behaviour of peers

*"It goes to the disrespectfulness of the other people who come here for breakfast. They take it for granted, you know." ... "Um, maybe seeing how people are when they are on their drugs or like, yeah, I think that's probably, I'm just seeing how people are and how they treat the property."*

### **Theme 5: Non-Judgmental and Respectful**

Participants appreciated the staff's non-judgmental attitude and respect towards them, which fostered a sense of trust and comfort.

*"They're not, they don't yell at you. They help you. Yeah, they help you. They're great. They're pretty good. I like it. No matter if they're black, oriental or, you know, white. They're nice people. I find them nice.*

## **Research Question 2**

What are the unanticipated positive and negative outcomes of NYFC program participation for users?

## **Theme 6: Positive Outcome: Reduced Harm and Safer Drug Use**

Code: Reduced depression, Reduced cravings, Reduced sharing, Disease prevention, Social Support Non-judgmental environment Safe space, quit, reduced harm, access to resources, emotional support, sense of community Safer Drug Use Practices

Participants reported that the harm reduction services, such as the safe injection site and access to clean supplies, helped them reduce the risks associated with drug use, including infections, abscesses, and overdoses. The centre provided a sense of community and support, helping participants feel less alone and more connected to others who understood their struggles. A participant unexpectedly found the program to be a catalyst for their recovery. Witnessing other program participants and interacting with staff inspired them to quit using substances and seek employment. They now work to help others in similar situations, demonstrating a positive ripple effect of the program. Participants appreciated the access to resources such as food, clothing, and housing assistance, which helped them meet their basic needs and improve their overall well-being.

*"They give me a place to use it where I'm going to be looking around my back like outside. And there I can sort of judge how much I'm using, how much I'm going to cut down. When you're outside, you can't see anything. So, you just pour whatever you get, and you do it. And there's all these people around asking for somewhere. So, this is great. This is privacy."*

*"They took my depression away." ... "a reduction in something negative, possibly cravings or withdrawal symptoms,' ... "It helped me from other people's flavours. From using other people's flavours." ... " It helped me from catching things from other people's pipes."*

*"... when you're down and out, they help you, you know." ... " they give me water, and you know, something to eat when I need it." ... " they're not racist or nothing, they're nice."*

*"...having access to like pipes and stuff helped me from not using needles... " ... " like for me like um an encouragement to using needles because they don't have pipes and just only needles like... and stop me from having to use needles."*

*"It's better than using needles and spreading AIDS or something like that or diseases and stuff like that. We're just here better ourselves, I guess."*

*"I'm just like scared of like catching something. I don't want to catch nothing because I want to live a healthy life"*

*" ... maybe if they had counsellors or something, or people, like, trying to, like, burn it in my brain, that, like, maybe it was my time to quit\*

### **Theme 7: Negative Outcomes: Drug Use Enablement**

The availability of harm reduction supplies could potentially *enable continued drug use* for some individuals. Other individuals struggling with addiction could expose participants to negative behaviours or triggers. The participants, expressed concern about the government's decision to stop providing free supplies, anticipating that this could lead to increased disease transmission and other negative consequences for the community

*"But, so, in, like, in that effect, I don't think, like, it's gonna help me quit, or do anything to reform my drug habits, but, I mean, that happens all the time, and it's, like, it's my choice when I stop." ... " It makes me feel bad. "Because I know I can't use the pipe. I know my limit."*

*"... but if people are using it all the time, it might affect them."*

*"Well, they can go crazy, they can start doing ugly things, they can start hurting other people, you know what I mean?"*

*"I'm scared that it'll cause me from using like what if I do get into needles? I'm just scared of catching something. I don't want to catch anything. I want to live a healthy life because I don't know. I believe I can overcome, you know, overcome this."*



Participants expressed frustration with *the limited hours of operation of the safe injection site*, highlighting the need for 24/7 access to ensure safety and prevent risky behaviours. *“Only, it's not open all the time. The biggest challenge is its limited hours—very limited. And you gotta get there, like, yeah, on time.” “Um. If you don't get a pipe from here, how will you get a pipe? Uh, I'll just keep my broken pipe and then re-blow it up because I know how to blowpipes.”* Some participants mentioned feeling uncomfortable due to the *disrespectful behaviour of other individuals* at the centre, suggesting a need for better management of such situations.

*“It goes to the disrespectfulness of the other people who come here for breakfast. They take it for granted, you know.”* **Witnessing overdoses** at or near the centre was a traumatic experience for some participants, emphasizing the importance of overdose prevention and response measures. *“Sometimes you got a stabbing going on. Sometimes you got everybody jelly jacking and laughing. And you got junkies coming in. They get sick, and then they get moody. They wanted that first high they ever got from the thing, right? So they were always chasing the first high, first high. And they get so fucking bored and frustrated at not reaching the potential of that first high. Because they want potential. They have potential, right? And that's the drug. There's the potential.”*

### **Research Question 3**

What factors motivate individuals to seek out harm reduction services at NYFC?

#### **Themes 8: Access, safety and risk reduction**

Codes: Access to resources, seeking a safe space, referral by others, proximity and accessibility, basic needs, cultural connection, privacy, non-judgmental environment

The NYFC's convenient location was a significant motivator for individuals seeking harm reduction services. For instance, a participant explicitly mentioned that the centre's proximity to his residence was a key factor in his decision to utilize their services. The desire

for a secure and private environment to use substances safely motivated individuals to seek out the NYFC's harm reduction services. The centre's injection site provided a controlled setting where individuals could access clean supplies and reduce the risks associated with unsafe drug use practices.

*"It is the closest to my house, to my cousin's house." ... "Somebody told me to come here."*  
*"This gave me a safe place to... Safe place? Yeah, to do whatever I was doing at the time."*  
*"So, it was housing services that brought me to this centre." "Privacy." "I guess the people, the culture." "The housing, the housing coordinator or whatever, they're helping me look for a place. The housing unit here is helping to look for a place." "Well, they'll help you get a hold of anything that you need online or get a hold of a housing worker or a life skills worker."*

The availability of essential resources like meals and clothing played a crucial role in attracting individuals to the NYFC. Some participants highlighted the importance of the centre's meal services in their decision to seek help there. “

*"It was just breakfast that drew me here. The breakfast is every day, no matter what, and like, it's always on, and a lot of people enjoy it." "It was the lunch, breakfast, the food that brought me here." "Uh, mealtimes." "... when I came to this neighbourhood, and it was just breakfast that drew me here. The breakfast is every day, no matter what, and, like, it's always on, and a lot of people enjoy it..."*

The NYFC's reputation for having friendly, non-judgmental staff created a safe and welcoming atmosphere that encouraged individuals to access harm reduction services. Some participants emphasized the staff's positive attitude and truthfulness as factors that made them feel comfortable and supported.

*"Staff, they're, they're great with me. They, they're always smiling, happy, and they're always truthful, and I, like, it feels, feels like home, like how I was growing up on my research."*

#### Research Question 4

What barriers prevent people from accessing or fully utilizing the harm reduction program services at NYFC?

##### Limited Operating Hours

The restricted operating hours of the safe injection site posed a significant barrier for individuals seeking to utilize this service. Bradley emphasized that the limited hours were a major challenge and suggested that 24/7 availability would be more beneficial.

*“Only, it's not open all the time. The biggest challenge is the limited hours of it, very limited.”*

##### Limited Space and Capacity

The safe injection site's limited capacity, with only harm reduction stalls, was identified as a potential barrier to access. A participant pointed out that the lack of space could lead to overcrowding and potentially deter individuals from using the service.

*“...sometimes it's full, and there's, like, an issue there, there's not enough, there's not enough space, maybe, or there's just, you know, not enough hours that it's open.” “It isn't very accessible. Everyone struggles with that, you know.”*

##### Fear of Stigma and Judgment

While the NYFC staff was generally perceived as non-judgmental, the fear of stigma and judgment from others in the community remained a potential barrier for some individuals. A participant mentioned that witnessing the behaviour of other drug users on the premises could discourage some people from accessing the centre's services.

*“Um, maybe seeing how people are when they are on their drugs or like, yeah, I think that's probably, I'm just seeing how people are and how they treat the property.” “Maybe just the fact that, like, like, when you do, and they do ask you your name, or they ask you what you're using, and maybe some people think that that has something to do with, like, recording*

*something to use against them, or something, and people are paranoid that, like, that's gonna come and affect them in some negative way.” “Public use. People seeing you go in that room, it's like, some people don't want people to know the use, right? So, you know, they don't use the facility because they don't want people to know the use, right?”*

### **Suggestions for Program Improvement**

Participants suggested improvements such as a larger space, a smoking room with ventilation, and more cultural games to enhance the physical environment and create a more engaging atmosphere.

*“Get a bigger space. Bigger space. And what else? Get cultural games back. Different cultural games, such as Chinese checkers and Indian dominoes, Even try and set up teams, something that you can play and get people interactive and healthier. If there's drug use and still being healthy, you know, at least that's a good part of their body, right? They can, uh, it's immunity, right?”*

All of the overdose cases would be taken care of. *“As you may know, we have paramedics on-site”. “A lot of people are overdosed, and we don't get there in time”. You know, they could have been fucking here with friends, with other people that use that comfort level that that gives them.*

While not explicitly stated as a barrier, the participant's suggestion for improvements (computers, warming/cooling stations), and transportation implies that the lack of certain resources could hinder the program's ability to fully support its participants. Although not a barrier directly related to the centre itself, the participant expressed concern that the government's decision to stop providing free supplies could create barriers to accessing clean harm-reduction tools, potentially leading to negative health consequences.

### **Discussion**

The results are consistent with existing research on harm reduction programs, highlighting their successes and challenges. The positive staff interactions, safe atmosphere, and non-judgmental environment reported by participants align with literature emphasizing the importance of building trust and rapport in harm reduction settings (Framow-Wong et al., 2024; Pires et al., 2003). The study's findings also support the notion that harm reduction programs can lead to unanticipated positive outcomes, such as reduced harm, safer drug use practices, and even recovery, as evidenced by the participant who found inspiration in the program to quit using substances and seek employment. Access to resources like food and housing assistance is also in line with research that shows how important it is to deal with basic social determinants of people's health to improve their overall health and lower the harms (Rolfe et al., 2020) that could be caused by drug use.

Harm reduction services have their barriers (The Ontario HIV Treatment Network, 2022). The study's findings also shed light on the challenges and barriers that individuals face in accessing and utilizing harm reduction services. The limited operating hours of the safe injection site, as highlighted by the participants, is a common challenge, with research suggesting that access is crucial to ensure safety and prevent risky behaviours (Kerr et al., 2005). Furthermore, logistical challenges, such as transportation, were identified by the participants as barriers to service use. Previous research (Ahern et al., 2007; Enich et al., 2023; Framow-Wong et al., 2024; Pires et al., 2003) has also identified barriers such as the limited space and capacity of the safe injection site, as well as the fear of stigma and judgment. The study's findings on the potential for harm reduction supplies to enable continued drug use and the negative influence of witnessing others struggling with addiction also echo concerns.

The suggestions for program improvement offered by the participants, such as a larger space, a smoking room with ventilation, and more cultural games, provide valuable insights

for enhancing the program's effectiveness and addressing the identified barriers. The call for flexible scheduling and access to the safe injection site and the continual provision of a wider range of harm reduction supplies, including pipes, also aligns with recommendations from the literature to expand access and reduce barriers to harm reduction services (Pires et al., 2003).

## **Chapter V: Conclusion**

This qualitative study aimed to investigate the lived experiences of participants within the Nēwo-Yōtina Friendship Centre's (NYFC) harm reduction program in Regina, Saskatchewan. Using both phenomenology and thematic analysis, the study digs deeper into how users see the program, how they interact with it, and what results they get from it. The study's findings highlight several critical aspects of the user experience. In the area of the program environment, participants generally reported a positive and welcoming environment within the harm reduction program. The physical space, staff interactions, and overall atmosphere were described as supportive and non-judgmental. Beyond the intended harm reduction benefits, participants identified some unanticipated positive outcomes, such as increased self-esteem, stronger social connections, and a renewed sense of hope. Some participants also mentioned negative outcomes related to stigma or difficulties navigating complex systems. The study revealed a variety of motivations for seeking out NYFC's harm reduction services. These included personal concerns about health and safety, recommendations from friends or family, and a desire to access resources and support. However, while the program environment was generally positive, some participants identified barriers to accessing services, such as transportation difficulties, scheduling conflicts, and fear of stigma within the broader community.

The insights gleaned from this study offer valuable guidance for enhancing NYFC's harm reduction program. The centre needs to strengthen its support systems for the centre's clients. Building upon the positive program environment, NYFC can further enhance support

systems by offering more comprehensive counselling, peer support groups, and referrals to other relevant services. Furthermore, by acknowledging and addressing both positive and negative unanticipated outcomes, NYFC can tailor its services to better meet participants' holistic needs. To overcome barriers to access, NYFC can explore strategies such as offering flexible scheduling, transportation assistance, and community outreach initiatives to reduce stigma. From a practical standpoint, the study's findings offer actionable recommendations for the NYFC. By addressing the identified barriers, enhancing the program environment, and leveraging the unanticipated positive outcomes, the NYFC can further strengthen its harm reduction program and better serve the community.

### **Limitations and futures directions**

As with any qualitative study, the findings are not generalizable to all harm reduction programs or user populations. Future research could explore the experiences of specific subgroups within the NYFC program, such as youth, Indigenous women, or individuals with co-occurring mental health conditions. This study is limited by its small sample size and focus on a single harm reduction program. Future research could expand on these findings by including a larger and more diverse sample, as well as exploring user experiences in other harm reduction settings. Additionally, longitudinal studies could examine the long-term impact of harm reduction programs on participants' lives.

### **Ethical Statement**

The research presented in this manuscript involved human participants. Following Article 2.5 of the Tri-Council Policy Statement: Ethical Conduct for Research Involving Humans (TCPS 2), the research qualified for exemption status. The Behavioural Research Ethics Board at the University of Saskatchewan granted an exemption from ethics review. All research procedures were conducted ethically, adhering to the principles of informed consent, confidentiality, and respect for persons."

### Conflict of Interest:

The authors declare that they have no known competing financial interests or personal relationships that could have appeared to influence the work reported in this opinion paper.

### References

- Adu, P. (2023, April 21). *NVivo for Beginners: How to Categorize Codes to Develop Themes* [Video]. YouTube. <https://www.youtube.com/watch?v=mrrioduYXWE4>
- Ahmed, S. K. (2024). The Pillars of Trustworthiness in Qualitative Research. *Journal of Medicine Surgery and Public Health*, 100051.  
<https://doi.org/10.1016/j.glmedi.2024.100051>
- Ahern, J., Stuber, J., & Galea, S. (2007). Stigma, discrimination and the health of illicit drug users. *Drug and Alcohol Dependence*, 88(2–3), 188–196.  
<https://doi.org/10.1016/j.drugalcdep.2006.10.014>
- Belzak, L., & Halverson, J. (2018). Evidence synthesis - The opioid crisis in Canada: a national perspective. *Health Promotion and Chronic Disease Prevention in Canada*, 38(6), 224–233. <https://doi.org/10.24095/hpcdp.38.6.02>
- Braun, V., & Clarke, V. (2006). Using thematic analysis in psychology. *Qualitative Research in Psychology*, 3(2), 77–101. <https://doi.org/10.1191/1478088706qp063oa> Available from: <http://eprints.uwe.ac.uk/11735>
- Brinkmann, S. (2014). *Unstructured and Semi-Structured Interviewing*. 276–299.  
<https://doi.org/10.1093/oxfordhb/9780199811755.013.030>
- Canadian Mental Health Association, Ontario. *Harm Reduction*.  
<https://ontario.cmha.ca/harm-reduction>
- Cherrier, N., Kearon, J., Tetreault, R., Garasia, S., & Guindon, E. (2021). Community Distribution of Naloxone: A Systematic Review of Economic Evaluations.



*PharmacoEconomics - Open*, 6(3), 329–342. <https://doi.org/10.1007/s41669-021-00309-z>

Creswell, J. W., & Miller, D. L. (2000). Determining Validity in Qualitative Inquiry. *Theory Into Practice*, 39(3), 124–130. [https://doi.org/10.1207/s15430421tip3903\\_2](https://doi.org/10.1207/s15430421tip3903_2)

Creswell, J. W., & Poth, C. N. (2024). *Qualitative inquiry & research design: choosing among five approaches*. (5th ed.). Sage Publications. <https://uk.sagepub.com/en-gb/eur/qualitative-inquiry-and-research-design/book266033>

Enich, M., Flumo, R., Campos, S., Flores, N., Sullivan, N., Mellor, J., O’Neill, C., & Nyaku, A. N. (2023). Overdose education and naloxone distribution program design informed by people who use drugs and naloxone distributors. *Preventive Medicine Reports*, 35, 102374. <https://doi.org/10.1016/j.pmedr.2023.102374>

Framow-Wong, L., Martín, M., Thomas, L., Giuliano, R., Nguyen, O. K., Knight, K., & Suen, L. W. (2024). Patient and Staff Perspectives on the Impacts and Challenges of Hospital-Based Harm Reduction. *JAMA Network Open*, 7(2), e240229. <https://doi.org/10.1001/jamanetworkopen.2024.0229>

Fernandes, R. M., Cary, M., Duarte, G., Jesus, G., Alarcão, J., Torre, C., Costa, S., Costa, J., & Carneiro, A. V. (2017). Effectiveness of needle and syringe Programmes in people who inject drugs – An overview of systematic reviews. *BMC Public Health*, 17(1). <https://doi.org/10.1186/s12889-017-4210-2>

Government of Canada (2024). *Supervised consumption explained: types of sites and services*. <https://www.canada.ca/en/health-canada/services/substance-use/supervised-consumption-sites/explained.html>

Ide, Y., & Beddoe, L. (2023). Challenging perspectives: Reflexivity as a critical approach to qualitative social work research. *Qualitative Social Work*, 23(4), 725–740. <https://doi.org/10.1177/14733250231173522>

- Inciardi, J. A., & Harrison, L. (1999). *Harm Reduction: National and International Perspectives*. Sage Publications. <https://www.ojp.gov/ncjrs/virtual-library/abstracts/harm-reduction-national-and-international-perspectives>
- Kalpokas, N., & Hecker, J. (n.d.). *The Guide to Thematic Analysis*. ATLAS.ti. <https://atlasti.com/guides/thematic-analysis>
- Kerr, T., Mitra, S., Kennedy, M. C., & McNeil, R. (2017). Supervised injection facilities in Canada: past, present, and future. *Harm Reduction Journal*, 14(1). <https://doi.org/10.1186/s12954-017-0154-1>
- Kerr, T., Small, W., & Wood, E. (2005). The public health and social impacts of drug market enforcement: A review of the evidence. *International Journal of Drug Policy*, 16(4), 210–220. <https://doi.org/10.1016/j.drugpo.2005.04.005>
- Leslie, K., Society, C. P., & Committee, A. H. (2008). Harm reduction: An approach to reducing risky health behaviours in adolescents. *Paediatrics & Child Health*, 13(1), 53–56. <https://doi.org/10.1093/pch/13.1.53>
- Leece, P. (2017). Evidence Brief: Evidence on drug checking services as a harm reduction intervention. *Ontario Agency for Health Protection and Promotion (Public Health Ontario)*, Toronto, ON: Queen's Printer for Ontario ISBN: 978-1-4606-9122-9 <https://substanceuse.ca/sites/default/files/2021-03/eb-drug-checking.pdf>
- Levengood, T. W., Yoon, G. H., Davoust, M. J., Ogden, S. N., Marshall, B. D., Cahill, S. R., & Bazzi, A. R. (2021). Supervised Injection Facilities as Harm Reduction: A Systematic Review. *American Journal of Preventive Medicine*, 61(5), 738–749. <https://doi.org/10.1016/j.amepre.2021.04.017>
- Lumivero. (2024, June 4). *Lumivero- NVivo Tutorials* - <https://lumivero.com/resources/support/getting-started-with-nvivo/nvivo-tutorials/>

- Maguire, M., & Delahunt, B. (2017). Doing a thematic analysis: A practical, step-by-step guide for learning and teaching scholars. *All-Ireland Journal of Higher Education*, 9(3), 351-3360. <http://ojs.aishe.org/index.php/aishe-j/article/view/335>
- Moran, L., Ondocsin, J., Outram, S., Ciccarone, D., Werb, D., Holm, N., & Arnold, E. A. (2024). How do we understand the value of drug checking as a component of harm reduction services? A qualitative exploration of client and provider perspectives. *Harm Reduction Journal*, 21(1). <https://doi.org/10.1186/s12954-024-01014-w>
- Morse, J. M. (2015). Critical Analysis of Strategies for Determining Rigor in Qualitative Inquiry. *Qualitative Health Research*, 25(9), 1212–1222.  
<https://doi.org/10.1177/1049732315588501>
- National Institute on Drug Abuse. (2021, December 1). *What is harm reduction?*  
<https://nida.nih.gov/videos/what-harm-reduction>
- Naumann, R. B., Durrance, C. P., Ranapurwala, S. I., Austin, A. E., Proescholdbell, S., Childs, R., Marshall, S. W., Kansagra, S., & Shanahan, M. E. (2019). Impact of a community-based naloxone distribution program on opioid overdose death rates. *Drug and Alcohol Dependence*, 204, 107536.  
<https://doi.org/10.1016/j.drugalcdep.2019.06.038>
- Ng, J., Sutherland, C., & Kolber, M. R. (2017, November 1). *Does evidence support supervised injection sites?* The College of Family Physicians of Canada.  
<https://www.cfp.ca/content/63/11/866.long>
- Pauly, B. (2008). Harm reduction through a social justice lens. *The International Journal of Drug Policy/International Journal on Drug Policy*, 19(1), 4–10.  
<https://doi.org/10.1016/j.drugpo.2007.11.005>
- Pires, R., Yeoman, R., Allen, T., Mackenzie, T., Panter, B., Mailman, J., & Boodhoo, T. (2003). *Engaging users, reducing harms: Collaborative research exploring the*

- practices and results of harm reduction*. United Way Report. Retrieved from <http://ekonomos.com/wp-content/uploads/2014/03/Harm-Reduction-Report.pdf>
- Plessis, U.D. (2022). *A Step-by-Step Guide to Doing Braun and Clarke's Reflexive Thematic Analysis*. DRM PsySSA. [Video]. YouTube.  
<https://www.youtube.com/watch?v=vkuSndj4mIA>
- Public Health Agency of Canada. (2023). Canadian drugs and substances strategy; overview.  
<https://www.canada.ca/en/health-canada/services/substance-use/canadian-drugs-substances-strategy.html>
- Public Health Agency of Canada. (March 2024). Opioid- and stimulant-related harms in Canada. Ottawa: *Federal, provincial, and territorial Special Advisory Committee on the Epidemic of Opioid Overdoses*. <https://health-infobase.canada.ca/substance-related-harms/opioids-stimulants/>
- Razaghizad, A., Windle, S. B., Filion, K. B., Gore, G., Kudrina, I., Paraskevopoulos, E., Kimmelman, J., Martel, M. O., & Eisenberg, M. J. (2021). The Effect of Overdose Education and Naloxone Distribution: An Umbrella Review of Systematic Reviews. *American Journal of Public Health, 111*(8), e1–e12.  
<https://doi.org/10.2105/ajph.2021.306306>
- Rolfe, S., Garnham, L., Godwin, J., Anderson, I., Seaman, P., & Donaldson, C. (2020). Housing as a social determinant of health and wellbeing: developing an empirically-informed realist theoretical framework. *BMC Public Health, 20*(1).  
<https://doi.org/10.1186/s12889-020-09224-0>
- Snowdon, J., & Choi, N. (2022). Unanticipated Changes in Drug Overdose Death Rates in Canada During the Opioid Crisis. *International Journal of Mental Health and Addiction, 22*(3), 1394–1412. <https://doi.org/10.1007/s11469-022-00932-9>

Tee-Melegrito, R. A. (2021, October 29). *What to know about needle exchange programs and HIV*. <https://www.medicalnewstoday.com/articles/needle-exchange-program-for-hiv>

US Centre for Disease Control and Prevention. (2024). *Lifesaving Naloxone. Stop Overdose*.  
<https://www.cdc.gov/stop-overdose/caring/naloxone.html>

The Ontario HIV Treatment Network. (2022). *A review of supervised inhalation services in Canada*. Rapid Response Service Toronto, ON: <https://www.ohtn.on.ca/rapid-response-a-review-of-supervised-inhalation-services-in-canada/>

Wenger, L. D., Doe-Simkins, M., Wheeler, E., Ongais, L., Morris, T., Bluthenthal, R. N., Kral, A. H., & Lambdin, B. H. (2022). Best practices for community-based overdose education and naloxone distribution programs: results from using the Delphi approach. *Harm Reduction Journal*, 19(1). <https://doi.org/10.1186/s12954-022-00639-z>

Yeh, P. T., Yang, X., Kennedy, C. E., Armstrong, K. A., Fonner, V. A., Sherryn, N., O'Reilly, K. R., & Sweat, M. D. (2023). The Impact of Needle and Syringe Exchange Programs on HIV-Related Risk Behaviors in Low- and Middle-Income Countries: A Systematic Review and Meta-analysis Examining Individual- Versus Community-Level Effects. *AIDS and Behavior*, 27(10), 3306–3331.

<https://doi.org/10.1007/s10461-023-04051-x>

(<file:///C:/Users/aoben/Downloads/s10461-023-04051-x.pdf>)
